# Supplementary material
Source: publisher figshare collection journal article supplement (https://tandf.figshare.com/ndownloader/files/16891544)
Supplement: Supplementary file 1 [file 16891544]

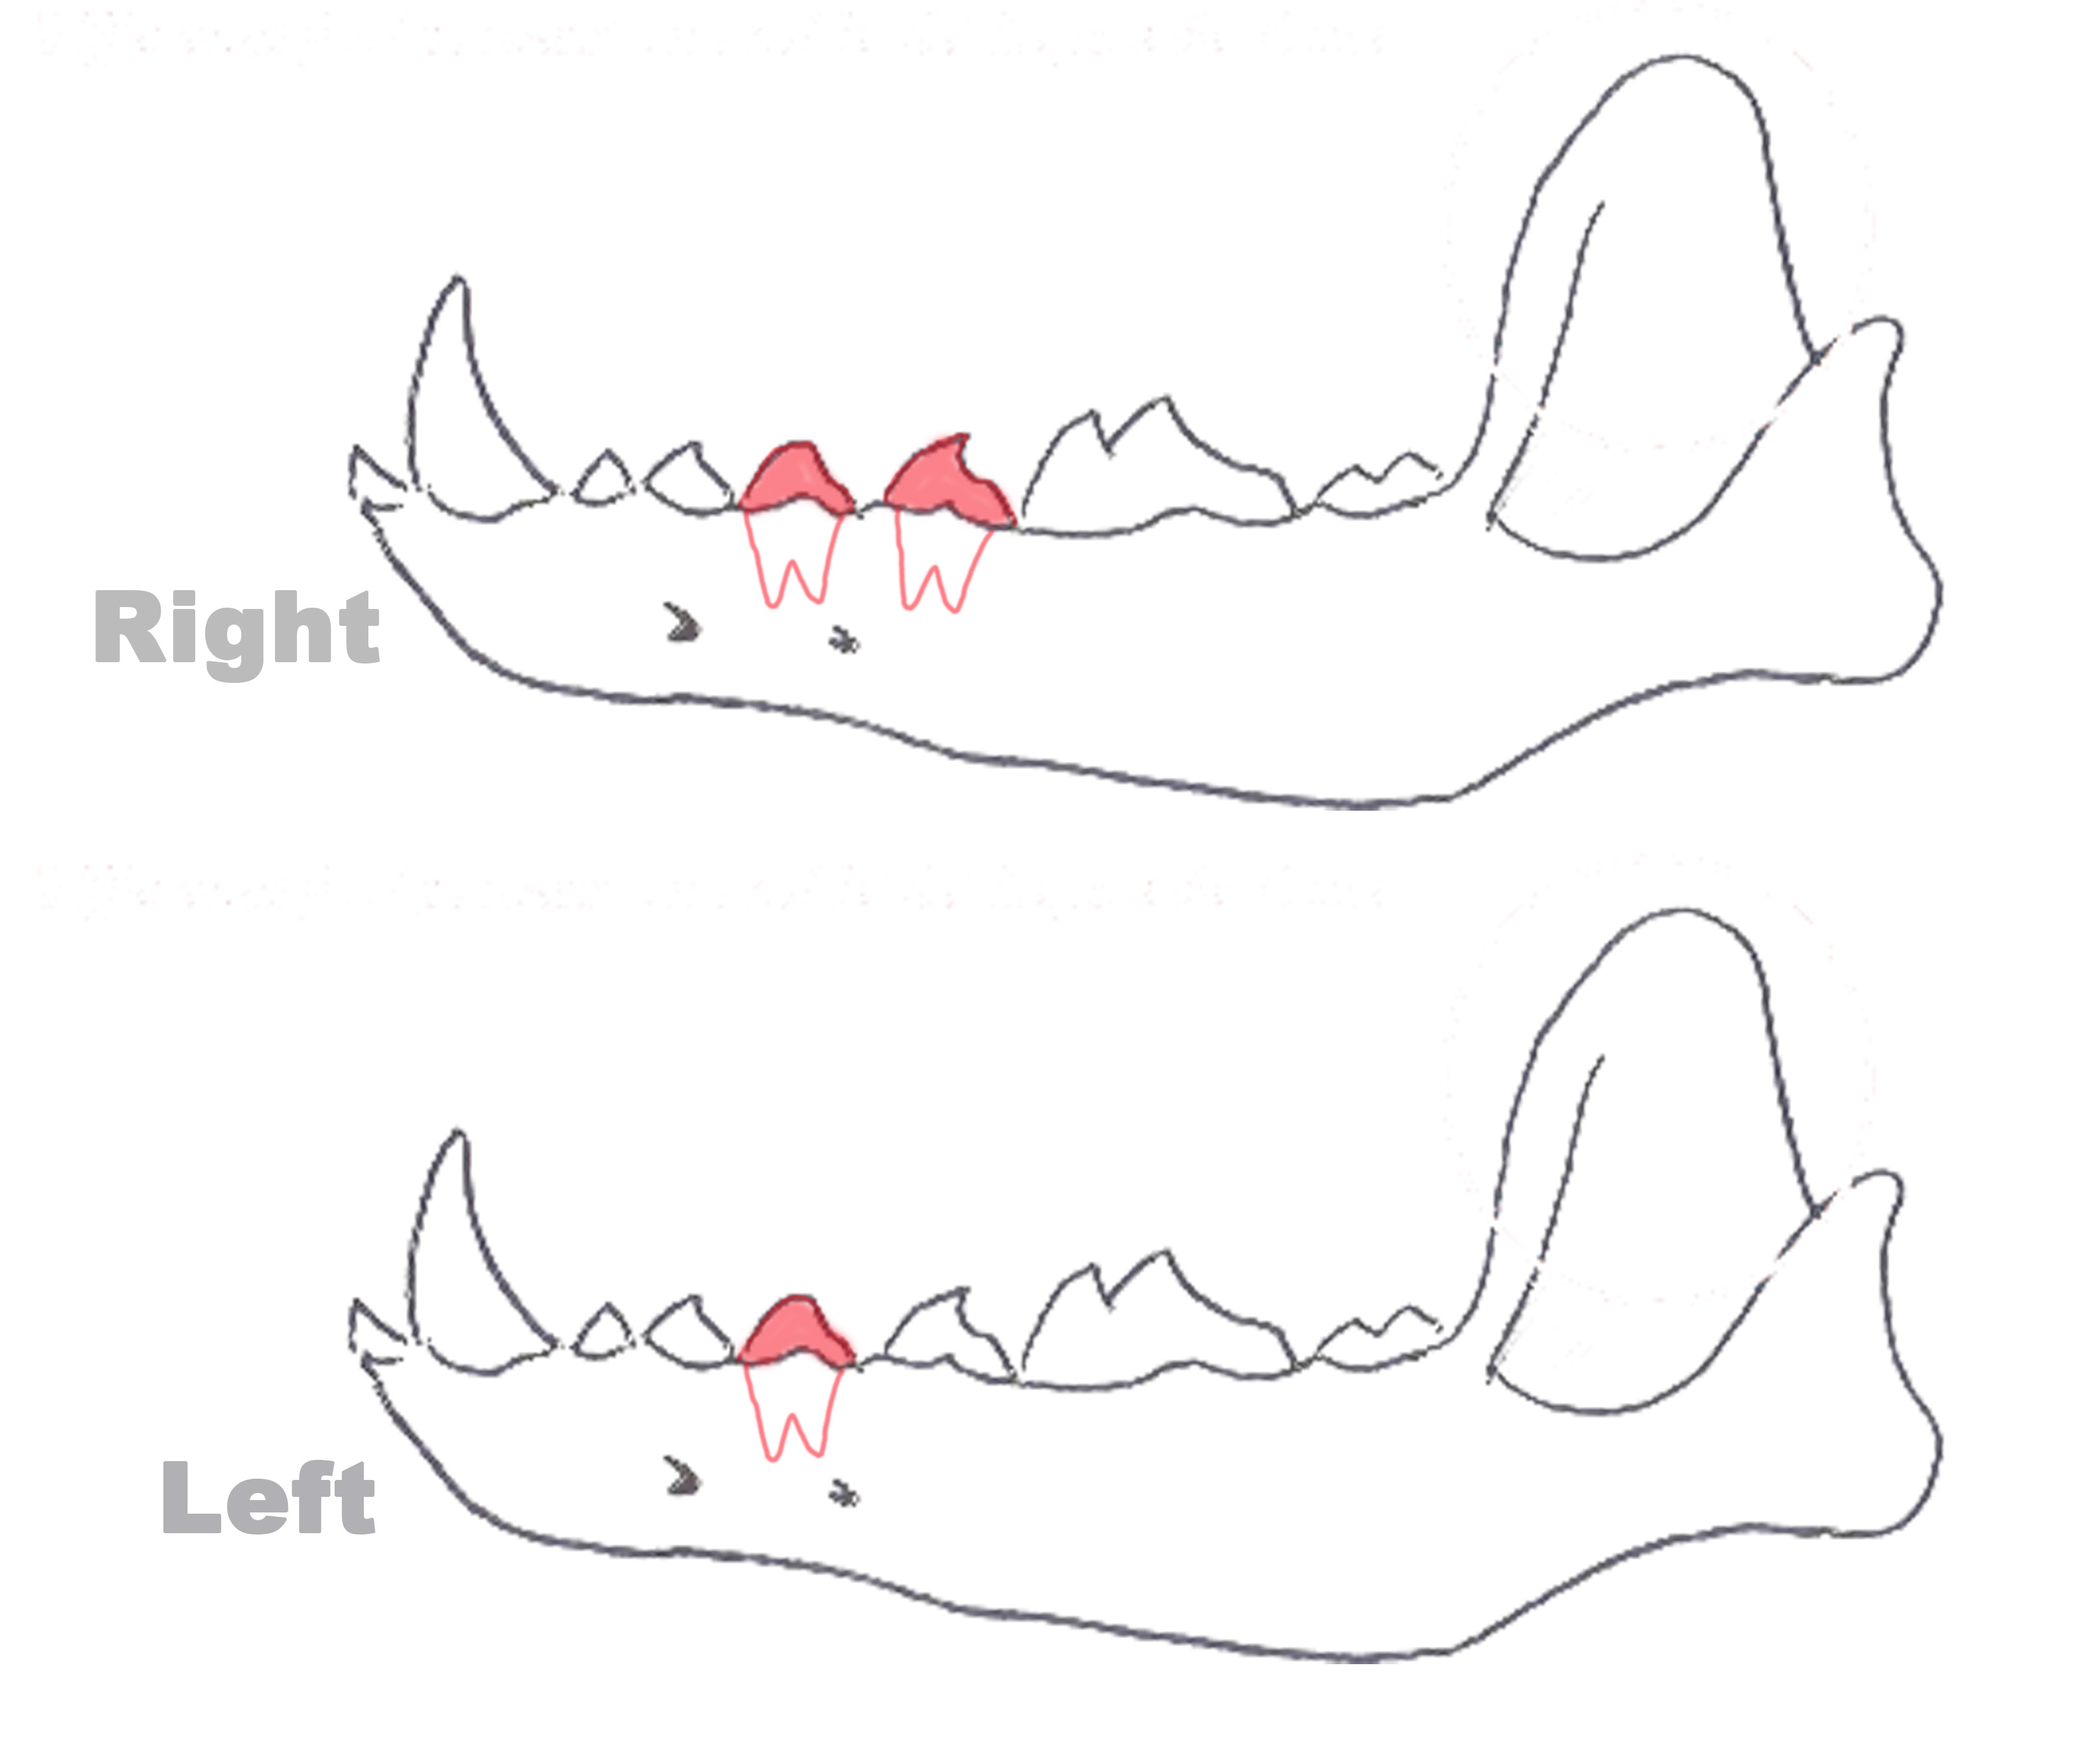


Figs.2. The third and fourth premolar of the right mandible and the third premolar of the left mandible of each dog were selected as experimental sites in vivo.
